# Supplementary material for: Accounting for the vertical distribution of emissions in atmospheric CO 2 simulations
Source: Copernicus journal article supplement (doi:10.5194/acp-2018-956), 2018-12-04
Supplement: Supplementary file [file acp-2018-956-AC1-supplement.pdf]

## Anonymous reviewer #2

We would like to thank the reviewer for the careful reading and constructive comments.

Please find below our point-by-point replies. For clarity, the reviewer's comments are displayed in black, our replies in blue, and suggestions for revised text in blue italics.

### Specific comments:

Page 4, Line 23: It might be good to include, after the sentence stating the height of the lowest vertical layer, a sentence stating that the vertical allocations will be described in more detail in section 2.4. Otherwise, an interested/over-eager reader may go searching for that information prematurely (as I just did).

We added a corresponding reference to Section 2.4.

Page 5, Line 16: Is there a citation yet for version 3 of the TNO/MACC inventory?

No, Kuenen et al. (2014) referring to version 2 is still the most appropriate reference.

Page 5, Line 19: It would be nice to have a reminder of the SNAP categories here.

We added a reference to Table 2 describing the 10 SNAP categories.

Page 5, Line 21: What are the 7 source categories used by the city of Berlin?

We added a reference to the publicly available final report of the SMARTCARB project, where more details on the Berlin inventory (including the mapping of its 7 categories to SNAP) can be found, see Table 2 in the report ([https://www.empa.ch/documents/56101/617885/FR\\_Smartcarb\\_final\\_Jan2019.pdf](https://www.empa.ch/documents/56101/617885/FR_Smartcarb_final_Jan2019.pdf))

Page 5, Line 24: Please go into more detail about how this "mapping" was performed. There may (necessarily) be inherent assumptions here that the reader should know about.

The sentence was not quite correct, since we did not perform a mapping to SNAP but rather a mapping to three broad source groups represented as separate tracers in our simulations. We changed the sentence to the following:

*In our simulations, separate tracers were included for three broad source groups: traffic, industry, heating. The attribution of the 10 SNAP categories in TNO/MACC-3 and the 7 source categories in the Berlin inventory to these groups are described in detail in the final report of the SMARTCARB project (Kuhlmann et al., 2019).*

Page 5, Line 28: How was this merging performed? An average of the two at each pixel? Figure 1: In the left image, what do the colors represent? Different source categories or emission fluxes? What are the units? If these really are both in units of flux, then I am wondering why there appear to be more strong point sources in the southern portion of the right image (post-projection) than the left (pre-projection).

We added the following sentence to clarify the merging:

*The merged emission  $e$  per grid cell was estimated as  $e = (1-f) e_{TNO} + e_{Berlin}$  where  $f$  is the fraction of the grid cell area covered by Berlin.*

Regarding Figure 1: The lefthand figure is only an illustration of the GIS-type of inventory, showing at the same time area, point and line sources, each of them in different units (in  $\text{kg s}^{-1}$  for point,  $\text{kg s}^{-1} \text{m}^{-1}$  for line and  $\text{kg s}^{-1} \text{m}^{-2}$  for area sources) each being colored separately between minimum and maximum values. In contrast to the right-hand figure, the left-hand figure can thus only be interpreted in a qualitative way. We will add this information.

Page 6, Lines 8-9: In what context were these flux tower fits performed to tune the remaining VPRM parameters? Was this further part of the SMARTCARB simulations? If so, could we get a little more information about which flux towers were used (or a citation)?

We will add the following sentence explaining the origin of the VPRM parameters used here:

*Model parameter values were taken from a previous study (Kountouris et al., 2018), in which they were optimized using data from 47 European eddy covariance measurement sites for the year 2007.*

Page 6, Lines 14-15: When the vertical layers were divided up to add new layers, how were the emissions distributed along those layers? For example, if the 4-90m EMEP level was divided into 3 COSMO-GHG levels—4-30, 30-60, and 60-90—were the emissions in 4-30 assigned to be identical, more, or less than those assigned to 60-90?

We added the following sentence to further clarify the procedure:

*The attribution of emissions to these sub-layers was done in a rough way, for example by placing a larger proportion of emissions from "combustion in manufacturing industry" into the upper parts but distributing emissions from "Non-industrial (residential) combustion" rather evenly over the three layers between 4-90m, considering that industrial sources are likely to emit at higher altitudes.*

All information on the finally applied vertical attribution of emissions to the layers is given in Tables 2 and Figure 2 of the manuscript.

Page 6, Line 18: Sentence starts with "This modification"; is this referring to the second of the 2 modifications? Or is this intended to read "These modifications"? If it is only referring to the second modification, then where did the 10% number come from in the first modification?

We changed the wording to "*This latter modification*". The 10% was a very rough assumption to account for CO<sub>2</sub> emissions from the waste sector not associated with waste incinerators.

Page 9, Line 14: What is the July difference in ppm, to compare against the 1.6 ppm in the previous (winter) paragraph?

The difference has a strong diurnal cycle in summer. We changed the corresponding sentence as follows:

*In summer, the differences are generally smaller and exhibit a pronounced diurnal cycle. Differences are about 1 ppm at night and almost vanish (about 0.1 ppm) in the afternoon.*

Page 9, Line 32: Is it stated somewhere how the column mean dry air mole fraction is calculated? I assume it is, as the name suggests, the mean concentration at each pixel along the full vertical column for each pixel in the domain, but it is worth stating this explicitly somewhere. Apologies if I just missed it.

The column mean dry air mole fraction is the column integrated amount of CO<sub>2</sub> (moles per m<sup>2</sup>) divided by the column integrated amount of dry air (moles per m<sup>2</sup>). We will add this information. We changed all references to "column mean" to "column-averaged".

Page 10, Lines 19-20: This last sentence is very confusing for me. What does the "95th percentile" refer to?

We will add "(see last column in Table 4)", since we are referring to the entries in this table here.

Page 10, Lines 21-22: Maybe not in this sentence, but somewhere in the next paragraph or two, it would be nice to support the "very large" differences assertion with a number (from Figure 12, presumably).

Since Figure 12 is only an illustration of the problem, we would like to refrain from providing a number here. The difference is as large as the amplitude of the plume, which, depending on weather situation, can be up to a few ppm in total column XCO<sub>2</sub> and even higher in individual vertical levels (as suggested by Fig. 12).

Page 12, Line 18: Similar to a comment above, I am still not clear on what the "highest percentiles" refers to.

As explained on page 9, we did not only look at mean values but also at different percentiles of the frequency distributions . The statistics for different percentiles are presented in Table 4. We think this should be sufficiently clear.

### Technical corrections:

Page 1, Line 12: Should read "The results suggest that..."

Done

Page 1, Line 18: Comma should be moved, I think: "..., the contributions from anthropogenic and natural fluxes and their sensitivity to climate change, and political and societal drivers."

Thank you for spotting. Done.

Page 2, Lines 13-16: I suggest putting commas around "such as the WMO's Integrated Global Greenhouse Gas Information System (IG3IS)" to make it an appositive, otherwise the sentence is a run-on.

Commas added.

Page 3, Line 4: "Hogue et al." missing a year, Line 8: "Lauvaux et al." also missing a year

Done

Page 4, Line 10: I am not able to make sense of the phrasing "to offload compute intensive part". Is it trying to say "to offload computationally-intensive parts"? If not, is it possible to reword/clarify?

Yes, that's what it means. "Compute-intensive" is a technically term commonly used in high-performance computing. We added the hyphen and changed "part" to "parts".

Page 4, Lines 11-12: The phrasing "which allows to increase..." feels awkward (and maybe incorrect?). I would consider rephrasing the sentence as "which allows for an increase in spatial and temporal resolution, and which greatly..."

This wording was awkward, indeed. Changed as suggested.

Page 4, Line 16: I think it's supposed to be "an NO<sub>2</sub>" not "a NO<sub>2</sub>", but I could be wrong.

You are probably right, changed.

Page 4, Lines 19-20: "250-km-wide" should be hyphenated to act as one adjective

Done

Page 12, Lines 3, 5, 8, 10, and 12: Might want to say "near" or "around" or some other phrase instead of "of/on the order of" so that readers do not think this is referring to an order of magnitude

Thank you. Mostly changed to "around".

Page 12, Line 11: "Bagley et al." does not have a year.

Year added.

Page 12, Line 25: Change "However, also these methods..." to "However, these methods also..." to correct awkward phrasing

Changed as suggested.
